# Supplementary material
Source: publisher figshare collection journal article supplement (https://acs.figshare.com/ndownloader/files/5838201)
Supplement: Supplementary file 1 [file 5838201]

Supporting information for *Org. Lett.*

## Rhodium(II,II) Dimer as an Efficient Catalyst for Aziridination of Sulfonamides and Amidation of Steroids

Jiang-Lin Liang, Shi-Xue Yuan, Philip Wai Hong Chan, and Chi-Ming Che\*

*Department of Chemistry and Open Laboratory of Chemical Biology of the Institute of Molecular Technology for Drug Discovery and Synthesis, The University of Hong Kong, Pokfulam Road, Hong Kong, P. R. China*

### Part I: Experimental Section

**General:**  $\text{PhI}(\text{OAc})_2$ ,  $\text{NH}_2\text{Ts}$  (Aldrich),  $\text{NH}_2\text{Ns}$ , cholesteryl acetate, 4-X-benzenesulfonyl chloride, (X = H, Methyl or Chloro: Acros),  $\text{Rh}_2(\text{OAc})_4$ , Doyle's catalyst  $\text{Rh}_2(4\text{S-MEOX})_4$  (Aldrich) were used as received. Solvents were purified according to standard procedures.  $\text{Al}_2\text{O}_3$  (pH = 7.4, Merck) was dried to constant weight at 250 °C for 12 h before use. Complexes  $\text{Rh}_2(\text{R-BNP})_4$ ,<sup>1</sup>  $\text{Rh}_2(\text{R-ODACA})_4$ ,<sup>2</sup> unsaturated sulfonamides **1**, **3–11**<sup>3</sup>,  $\text{PhI}=\text{NTs}$ <sup>4</sup> were prepared from respective literatures.  $^1\text{H}$  and  $^{13}\text{C}$  NMR spectra were measured on a Bruker DPX 400 or DPX-300 spectrometer with  $\text{CDCl}_3$  as the solvent (the chemical shifts are relative to tetramethylsilane). Mass spectra were obtained on a Finnigan MAT 95 mass spectrometer. HPLC measurements were carried out on a HP 1050 Series HPLC.

**Typical procedure for intramolecular aziridination of unsaturated sulfonamides catalyzed by rhodium dimer complexes:** Dichloromethane (1.5 mL) was added through syringe into a Schlenk flask containing unsaturated sulfonamides (0.2 mmol),  $\text{PhI}(\text{OAc})_2$  (0.3 mmol), catalyst (0.004 mmol),  $\text{Al}_2\text{O}_3$  (0.5 mmol), and molecular sieves (4 Å, 50 mg) under an argon atmosphere. The mixture was stirred at 40 °C for 3 h, diluted with dichloromethane (5 mL) after cooling to room temperature, and filtered through Celite. The residue on the Celite was washed with dichloromethane (2 × 5 mL). Evaporation of the combined filtrates under reduced pressure followed by chromatography on silica gel column with  $\text{CH}_2\text{Cl}_2$  as eluent afforded the cyclic sulfonamides as white solids.

**Spectral data of some unsaturated sulfonamides and the respective aziridination products:**

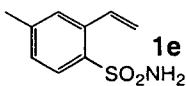 **1e**  $^1\text{H}$  NMR ( $\text{CDCl}_3$ , 400 MHz):  $\delta$  = 7.85 (d,  $J$  = 8.1 Hz, 1H), 7.49 (m, 1H), 7.39 (s, 1H), 7.17 (d,  $J$  = 8.0 Hz, 1H), 5.72 (d,  $J$  = 17.3 Hz, 1H), 5.49 (d,  $J$  = 11.0 Hz, 1H), 4.98 (s, 2H), 2.42 (s, 3H);  $^{13}\text{C}$  NMR ( $\text{CDCl}_3$ , 100 MHz):  $\delta$  = 143.6, 136.7, 133.7, 129.6, 128.9, 128.3, 127.8, 119.5, 21.4. HRMS (EI) calcd. for  $\text{C}_9\text{H}_{11}\text{NO}_2\text{S}$ : 197.0511, found: 197.0504.

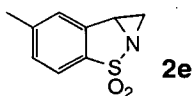 **2e**  $^1\text{H}$  NMR ( $\text{CDCl}_3$ , 400 MHz):  $\delta$  = 7.58 (d,  $J$  = 8.4 Hz, 1H), 7.34 (m, 2H), 4.06 (t,  $J$  = 4.4 Hz, 1H), 2.84 (d,  $J$  = 3.9 Hz, 1H), 2.47 (s, 3H)(m, 1H), 2.34

(d,  $J = 2.7$  Hz, 1H);  $^{13}\text{C}$  NMR ( $\text{CDCl}_3$ , 100 MHz):  $\delta = 144.5, 137.4, 131.2, 128.7, 125.7, 123.3, 43.9, 42.7, 21.6$ ; HRMS (EI) calcd. for  $\text{C}_9\text{H}_9\text{NO}_2\text{S}$ : 195.0354, found: 195.0350.

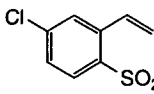 **1f**  $^1\text{H}$  NMR ( $\text{CDCl}_3$ , 400 MHz):  $\delta = 7.95$  (d,  $J = 8.4$  Hz, 1H), 7.58 (s, 1H), 7.47 (m, 1H), 7.37 (d,  $J = 8.2$  Hz, 1H), 5.78 (d,  $J = 17.3$  Hz, 1H), 5.59 (d,  $J = 11.0$  Hz, 1H), 4.85 (s, 2H);  $^{13}\text{C}$  NMR ( $\text{CDCl}_3$ , 100 MHz):  $\delta = 139.3, 138.6, 132.7, 129.3, 129.0, 128.3, 127.8, 121.0$ . HRMS (EI) calcd. for  $\text{C}_8\text{H}_8\text{ClNO}_2\text{S}$ : 216.9964, found: 216.9927.

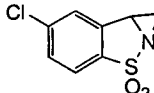 **2f**  $^1\text{H}$  NMR ( $\text{CDCl}_3$ , 300 MHz):  $\delta = 7.64$  (d,  $J = 8.3$  Hz, 1H), 7.54 (m, 2H), 4.09 (t,  $J = 4.4$  Hz, 1H), 2.89 (d,  $J = 3.8$  Hz, 1H), 2.39 (d,  $J = 2.6$  Hz, 1H);  $^{13}\text{C}$  NMR ( $\text{CDCl}_3$ , 75 MHz):  $\delta = 140.0, 138.9, 130.9, 128.9, 125.8, 124.8, 43.9, 42.2$ ; HRMS (EI) calcd. for  $\text{C}_8\text{H}_6\text{ClNO}_2\text{S}$ : 214.9808, found: 214.9814.

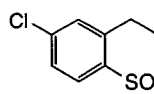 **1h**  $^1\text{H}$  NMR ( $\text{CDCl}_3$ , 400 MHz):  $\delta = 7.96$  (d,  $J = 8.5$  Hz, 1H), 7.35 (m, 2H), 6.00 (m, 1H), 5.21 (m, 2H), 4.97 (s, 2H), 3.84 (d,  $J = 6.3$  Hz, 2H);  $^{13}\text{C}$  NMR ( $\text{CDCl}_3$ , 100 MHz):  $\delta = 140.4, 139.2, 138.4, 135.7, 131.8, 129.9, 126.9, 118.0, 36.8$ ; HRMS (EI) calcd. for  $\text{C}_9\text{H}_{10}\text{ClNO}_2\text{S}$ : 231.0121, found: 231.0120.

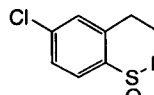 **2h**  $^1\text{H}$  NMR ( $\text{CDCl}_3$ , 400 MHz):  $\delta = 7.81$  (d,  $J = 8.4$  Hz, 1H), 7.49 (m, 1H), 7.29 (m, 1H), 3.58 (m, 1H), 3.23 (m, 1H), 2.51 (m, 1H), 1.92 (m, 1H);  $^{13}\text{C}$  NMR ( $\text{CDCl}_3$ , 100 MHz):  $\delta = 140.0, 133.0, 129.5, 129.3, 129.2, 127.8, 36.6, 29.8, 25.7$ ; HRMS (EI) calcd. for  $\text{C}_9\text{H}_8\text{ClNO}_2\text{S}$ : 228.9964, found: 228.9953.

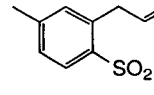 **1i**  $^1\text{H}$  NMR ( $\text{CDCl}_3$ , 300 MHz):  $\delta = 7.91$  (d,  $J = 8.0$  Hz, 1H), 7.14 (m, 2H), 6.02 (m, 1H), 5.15 (m, 2H), 4.87 (s, 2H), 3.84 (d,  $J = 6.3$  Hz, 2H), 2.39 (s, 3H);  $^{13}\text{C}$  NMR ( $\text{CDCl}_3$ , 75 MHz):  $\delta = 147.4, 143.7, 138.1, 137.0, 132.7, 128.6, 127.4, 117.1, 37.0, 21.3$ ; HRMS (EI) calcd. for  $\text{C}_{10}\text{H}_{13}\text{NO}_2\text{S}$ : 211.0667, found: 211.0662.

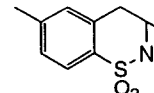 **2i**  $^1\text{H}$  NMR ( $\text{CDCl}_3$ , 300 MHz):  $\delta = 7.74$  (d,  $J = 8.0$  Hz, 1H), 7.29 (d,  $J = 8.0$  Hz, 1H), 7.07 (s, 1H), 3.56 (m, 1H), 3.20 (m, 2H), 2.45 (m, 1H), 2.41 (s, 3H), 1.89 (m, 1H);  $^{13}\text{C}$  NMR ( $\text{CDCl}_3$ , 75 MHz):  $\delta = 144.7, 131.1, 129.6, 129.5, 128.1, 126.2, 36.7, 29.7, 25.7, 21.6$ ; HRMS (EI) calcd. for  $\text{C}_{10}\text{H}_{11}\text{NO}_2\text{S}$ : 209.0511, found: 209.0502.

## References

- (a) McCarthy, N.; McKerver, M. A.; Ye, T.; McCann, M.; Murphy, E.; Doyle, M. P. *Tetrahedron Lett.* **1992**, 33, 5983. (b) Pirrung, M. C.; Zhang, J. *Tetrahedron Lett.* **1992**, 33, 5987.
- Pierson, N.; Fernandez-Garcia, C.; McKerver, M. A. *Tetrahedron Lett.* **1997**, 38, 4705.
- Dauban, P.; Dodd, R. H. *Org. Lett.* **2000**, 2, 2327

4. Yamada, Y.; Yamamoto, T.; Okawara, M. *Chem. Lett.* **1975**, 361.

**Part II: X-ray structure data of Aziridine 2j**

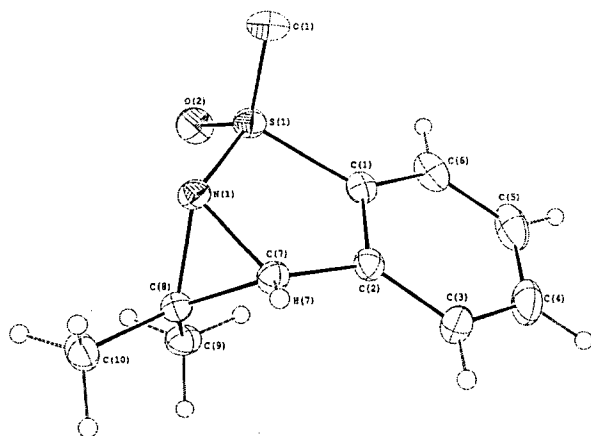

ORTEP drawing for **2j** crystallized from a racemic sample (only the structure of one enantiomer is shown).

Dr.Nianyong Zhu, Tel. 2859 2267, [nzhu@hkucc.hku.hk](mailto:nzhu@hkucc.hku.hk)

Rm. 301A

**Crystal data:**  $[C_{10}H_{11}NO_2S]$ ; formula weight = 209.26, Monoclinic,  $P2_1/n$ ,  $a = 6.6410(13) \text{ \AA}$ ,  $b = 10.961(2) \text{ \AA}$ ,  $c = 14.039(3) \text{ \AA}$ ,  $\beta = 94.40(3)^\circ$ ,  $V = 1018.9(4) \text{ \AA}^3$ ,  $Z = 4$ ,  $D_c = 1.364 \text{ g cm}^{-3}$ ,  $\mu(\text{Mo-K}\alpha) = 0.290 \text{ mm}^{-1}$ ,  $F(000) = 440$ ,  $T = 253 \text{ K}$ .

**Data collection:** A crystal of dimensions  $0.50 \times 0.45 \times 0.30 \text{ mm}$  mounted in a glass capillary was used for data collection at  $-20^\circ\text{C}$  on a MAR diffractometer with a 300 mm image plate detector using graphite monochromatized Mo-K $\alpha$  radiation ( $\lambda = 0.71073 \text{ \AA}$ ). Data collection was made with  $4^\circ$  oscillation step of  $\phi$ , 480 seconds exposure time and scanner distance at 120 mm. 45 images were collected.

**Data reduction:** The images were interpreted and intensities integrated using program DENZO<sup>1</sup>.

**Structure solution:** The structure was solved by direct methods employing SHELXS-97 program<sup>2</sup> on PC. Most of non-H atoms were located according to the direct methods. The positions of the other non-hydrogen atoms were found after successful refinement by full-matrix least-squares using program SHELXL-97<sup>3</sup> on PC.

**Structure refinement:** According to the SHELXL-97 program<sup>3</sup>, all 1850 independent reflections ( $R_{\text{int}}$ <sup>4</sup> equal to 0.0226, 1653 reflections larger than  $4\sigma(F_o)$ ) from a total 4824 reflections were participated in the full-matrix least-square refinement against  $F^2$ . These reflections were in the range  $-7 \leq h \leq 7$ ,  $-13 \leq k \leq 13$ ,  $-16 \leq l \leq 17$  with  $2\theta_{\text{max}}$  equal to  $51.24^\circ$ .

One crystallographic asymmetric unit consists of one formula unit. In the final stage of least-squares refinement, all non-H atoms were refined anisotropically. The positions of H atoms were calculated based on riding mode with thermal parameters equal to 1.2 times that of the associated C atoms, and participated in the calculation of final R-indices<sup>5</sup>.

Convergence ( $(\Delta/\sigma)_{\text{max}} = 0.001$ , av. 0.001) for 129 variable parameters by full-matrix least-squares refinement on  $F^2$  reaches to  $R_1 = 0.0426$  and  $wR_2 = 0.1174$  with a goodness-of-fit of 1.167, the parameters a and b for weighting scheme are 0.0683 and 0.2038. The final difference Fourier map shows maximum rest peaks and holes of 0.244 and  $-0.628 \text{ e \AA}^{-3}$  respectively.

**Drawing:** The ORTEP<sup>6</sup> drawing of the molecule was made with thermal ellipsoids at the 30 % probability level. Screen drawing is provided for reference. The drawing with high quality can be provided upon request.

**Tables:** Table (1) of Crystallographic and refinement data, table (3) of full bond lengths and bond angles and this report<sup>7</sup> are provided. The other supplementary materials, such as table of atomic coordinates with thermal parameters, table of anisotropic displacement parameters, table of hydrogen coordinates and/or other tables and/or CIF, RES-files, can be provided under request by notifying the identification code.

<sup>1</sup> Otwinowski, Z. and Minor, W., "Processing of X-ray Diffraction Data Collected in Oscillation Mode", Methods in Enzymology, Volume 276: Macromolecular Crystallography, part A, p. 307-326, 1997. Carter C. W., Sweet Jr. & R. M., Eds., Academic Press.

<sup>2</sup> SHELXS97, Sheldrick, G. M. (1997). SHELX97: Programs for Crystal Structure Analysis (Release 97-2). University of Goettingen, Germany.

<sup>3</sup> SHELXL97, Sheldrick, G. M. (1997). SHELX97. Programs for Crystal Structure Analysis (Release 97-2). University of Goettingen, Germany.

<sup>4</sup>  $R_{\text{int}} = \sum [F_o^2 - F_o^2(\text{mean})] / \sum [F_o^2]$

<sup>5</sup> Since the structure refinements are against  $F^2$ , R-indices based on  $F^2$  are larger than (more than double) those based on F. For comparison with older refinements based on F and an OMIT threshold, a conventional index  $R_1$  based on observed F values larger than  $4\sigma(F_o)$  is also given (corresponding to  $\text{Intensity} \geq 2\sigma(I)$ ).  $wR_2 = \{ \sum [w(F_o^2 - F_c^2)^2] / \sum [w(F_o^2)^2] \}^{1/2}$ .  $R_1 = \sum ||F_o| - |F_c|| / \sum |F_o|$ . The Goodness of Fit is always based on  $F^2$ :  $\text{Goof} = S = \{ \sum [w(F_o^2 - F_c^2)^2] / (n - p) \}^{1/2}$ , where n is the number of reflections and p is the total number of parameters refined. The weighting scheme is:  $w = 1/[\sigma^2(F_o^2) + (aP)^2 + bP]$ , where P is  $[2F_c^2 + \text{Max}(F_o^2, 0)]/3$ .

<sup>6</sup> ORTEP3 for Windows - Farrugia, L. J. (1997) J. Appl. Cryst. 30, 565.

<sup>7</sup> The crystallographic data summarized in this reported are abstracted from the previous tables and the experiment record.

D:\CMCh\mar656\_LiangJL\report\_mar656.doc

29/7/2002

Table 1. Crystal data and structure refinement for mar656.

|                                   |                                                    |                |
|-----------------------------------|----------------------------------------------------|----------------|
| Identification code               | mar656                                             |                |
| Empirical formula                 | C <sub>10</sub> H <sub>11</sub> N O <sub>2</sub> S |                |
| Formula weight                    | 209.26                                             |                |
| Temperature                       | 253(2) K                                           |                |
| Wavelength                        | 0.71073 Å                                          |                |
| Crystal system                    | Monoclinic                                         |                |
| Space group                       | P 2 <sub>1</sub> /n                                |                |
| Unit cell dimensions              | a = 6.6410(13) Å                                   | α = 90°.       |
|                                   | b = 10.961(2) Å                                    | β = 94.40(3)°. |
|                                   | c = 14.039(3) Å                                    | γ = 90°.       |
| Volume                            | 1018.9(4) Å <sup>3</sup>                           |                |
| Z                                 | 4                                                  |                |
| Density (calculated)              | 1.364 Mg/m <sup>3</sup>                            |                |
| Absorption coefficient            | 0.290 mm <sup>-1</sup>                             |                |
| F(000)                            | 440                                                |                |
| Crystal size                      | 0.50 x 0.45 x 0.30 mm <sup>3</sup>                 |                |
| Theta range for data collection   | 2.36 to 25.62°.                                    |                |
| Index ranges                      | -7<=h<=7, -13<=k<=13, -16<=l<=17                   |                |
| Reflections collected             | 4824                                               |                |
| Independent reflections           | 1850 [R(int) = 0.0226]                             |                |
| Completeness to theta = 25.62°    | 96.4 %                                             |                |
| Absorption correction             | None                                               |                |
| Max. and min. transmission        | 0.9181 and 0.8686                                  |                |
| Refinement method                 | Full-matrix least-squares on F <sup>2</sup>        |                |
| Data / restraints / parameters    | 1850 / 0 / 129                                     |                |
| Goodness-of-fit on F <sup>2</sup> | 1.167                                              |                |
| Final R indices [I>2sigma(I)]     | R1 = 0.0426, wR2 = 0.1174                          |                |
| R indices (all data)              | R1 = 0.0462, wR2 = 0.1195                          |                |
| Largest diff. peak and hole       | 0.244 and -0.628 e.Å <sup>-3</sup>                 |                |

Table 3. Bond lengths [Å] and angles [°] for mar656.

|                |            |                 |            |
|----------------|------------|-----------------|------------|
| S(1)-O(1)      | 1.4312(14) | C(7)-N(1)-C(8)  | 59.19(11)  |
| S(1)-O(2)      | 1.4346(15) | C(7)-N(1)-S(1)  | 108.98(11) |
| S(1)-N(1)      | 1.6609(16) | C(8)-N(1)-S(1)  | 119.89(12) |
| S(1)-C(1)      | 1.752(2)   | C(2)-C(1)-C(6)  | 122.6(2)   |
| N(1)-C(7)      | 1.507(2)   | C(2)-C(1)-S(1)  | 109.52(14) |
| N(1)-C(8)      | 1.515(2)   | C(6)-C(1)-S(1)  | 127.91(17) |
| C(1)-C(2)      | 1.385(3)   | C(3)-C(2)-C(1)  | 119.24(19) |
| C(1)-C(6)      | 1.391(3)   | C(3)-C(2)-C(7)  | 127.34(18) |
| C(2)-C(3)      | 1.381(3)   | C(1)-C(2)-C(7)  | 113.39(16) |
| C(2)-C(7)      | 1.487(3)   | C(2)-C(3)-C(4)  | 118.6(2)   |
| C(3)-C(4)      | 1.386(3)   | C(3)-C(4)-C(5)  | 121.4(2)   |
| C(4)-C(5)      | 1.386(4)   | C(6)-C(5)-C(4)  | 120.8(2)   |
| C(5)-C(6)      | 1.373(3)   | C(5)-C(6)-C(1)  | 117.4(2)   |
| C(7)-C(8)      | 1.493(2)   | C(2)-C(7)-C(8)  | 117.95(15) |
| C(8)-C(9)      | 1.498(3)   | C(2)-C(7)-N(1)  | 110.36(15) |
| C(8)-C(10)     | 1.507(3)   | C(8)-C(7)-N(1)  | 60.69(11)  |
|                |            | C(7)-C(8)-C(9)  | 122.36(16) |
| O(1)-S(1)-O(2) | 117.17(9)  | C(7)-C(8)-C(10) | 116.98(17) |
| O(1)-S(1)-N(1) | 106.71(8)  | C(9)-C(8)-C(10) | 114.10(17) |
| O(2)-S(1)-N(1) | 111.13(8)  | C(7)-C(8)-N(1)  | 60.12(11)  |
| O(1)-S(1)-C(1) | 109.64(9)  | C(9)-C(8)-N(1)  | 122.25(15) |
| O(2)-S(1)-C(1) | 112.85(9)  | C(10)-C(8)-N(1) | 110.08(16) |
| N(1)-S(1)-C(1) | 97.40(8)   |                 |            |

Symmetry transformations used to generate equivalent atoms:
